# Supplementary material
Source: PubMed Central journal article supplement (PMC5127671)
Supplement: jci-126-88625-s001.pdf [file jci-126-88625-s001.pdf]

1 **Supplementary Materials**

2  
3 **Supplementary figures**

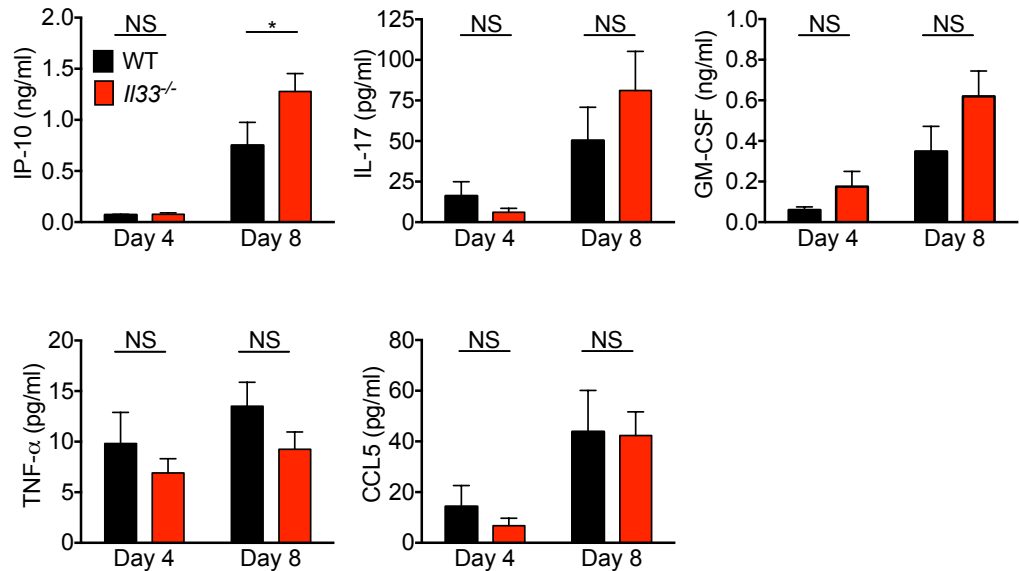

4 **Supplementary figure 1. Modulation in cytokine production in DSS treated I133<sup>-/-</sup> mice.**

5 Quantification of indicated cytokines in the colon explants of WT and I133<sup>-/-</sup> mice at indicated  
6 days post DSS administration. Similar data was obtained with the sera (not shown). Data  
7 represent two independent experiments and analyzed by Mann-Whitney U test. Error bars  
8 represent mean±S.E.M with 10 mice per group per time point.  
9

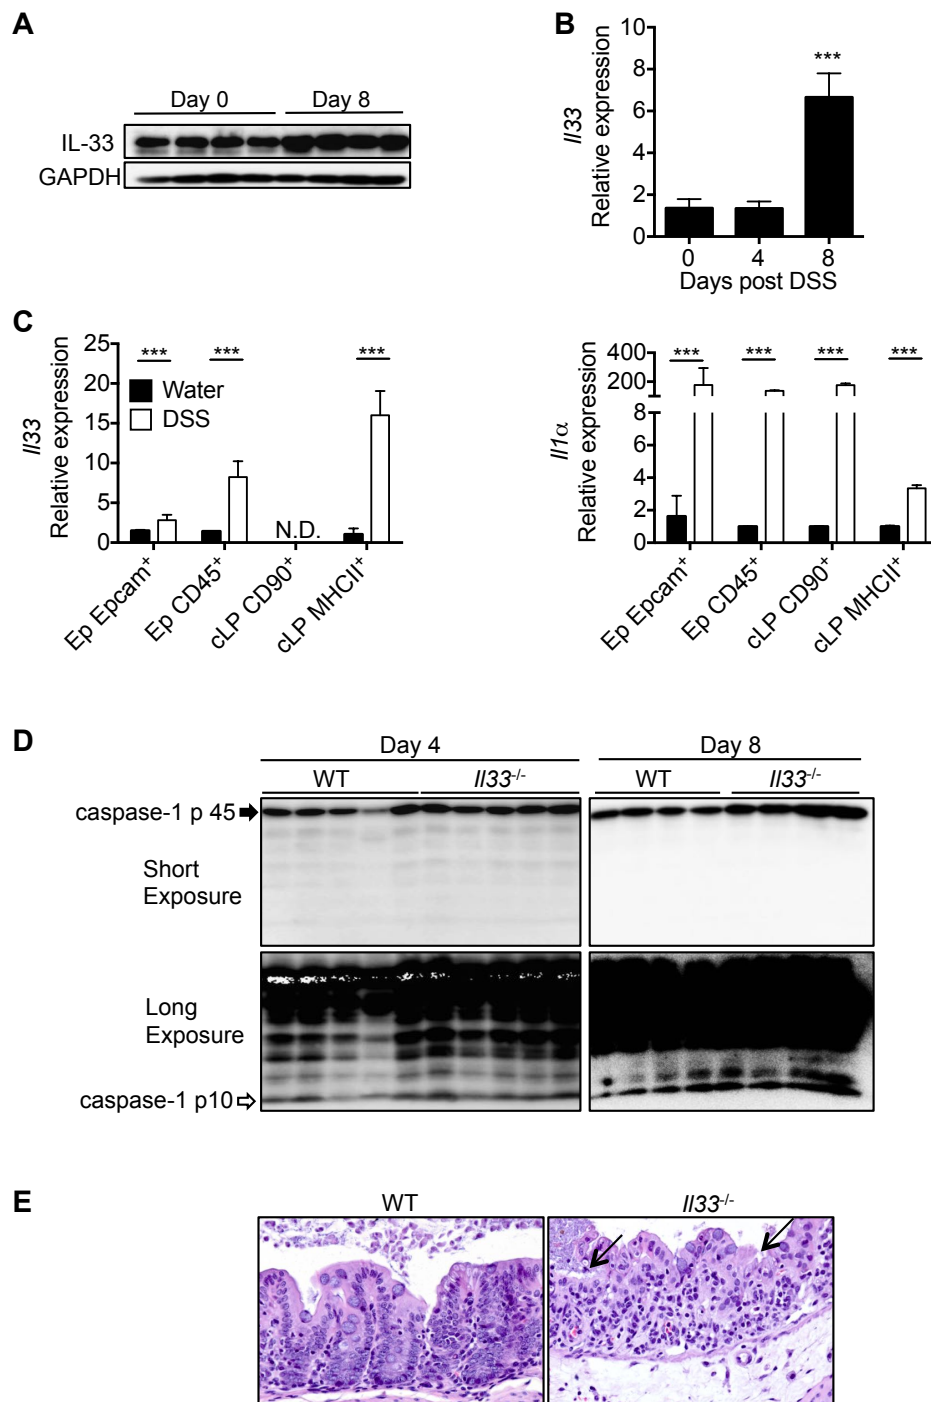

**Supplementary figure 2. Levels of IL-33 and IL-1α are increased in the colon after DSS administration.** WT and IL33<sup>-/-</sup> mice were treated with DSS in drinking water for 6 days, followed by drinking water for 2 days. **(A)** Western blot analysis for IL-33 in the colon lysates. **(B)** qRT-PCR for IL33 expression in the colon tissue. **(C)** qRT-PCR analysis of IL33 and IL1α expression from indicated cell populations from the epithelial (Ep) and colonic lamina propria (cLP) fractions of WT mice at day 8. **(D)** Western blot analysis for caspase-1 in colon lysates. **(E)** H&E staining at 40x original magnification of colon sections at day 4 post DSS. Data represent two

independent experiments and analyzed by Mann-Whitney U test. Error bars represent mean $\pm$ S.E.M with 5 mice per group per time point.

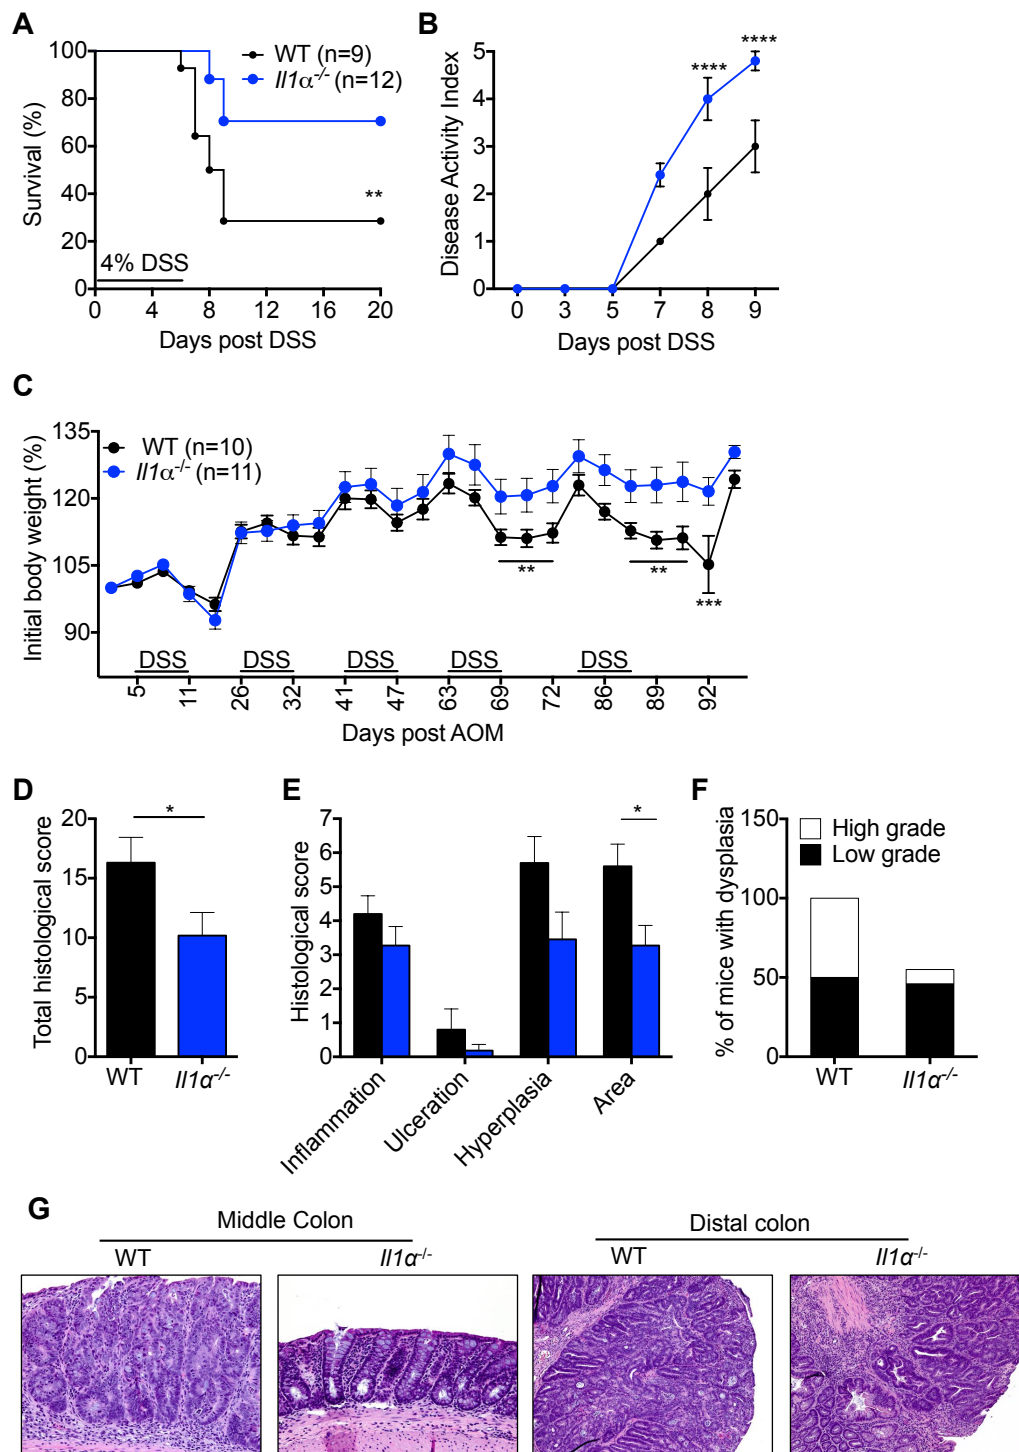

**Supplementary figure 3. IL-1 $\alpha$  promotes colitis and associated cancer.** (A) Survival and (B) disease Activity Index of WT and *Il1 $\alpha$* <sup>-/-</sup> mice administered 4% DSS in drinking water. (C) Body weight change of WT and *Il1 $\alpha$* <sup>-/-</sup> mice injected with AOM on day 0 and administered 5 rounds of 3.5% DSS in drinking water. (D) and (E) Colon histology analysis and (F) proportion of mice with low- or high-grade epithelial dysplasia at day 108 post AOM injection. (G) H&E staining at 10x original magnification of the distal and middle colon sections at day 108 post AOM injection.

Data represent two independent experiments and analyzed by two-way ANOVA followed by Holm-Sidak post test (**B** and **C**) or Mann-Whitney U test (**D** and **E**). Error bars represent mean±S.E.M.

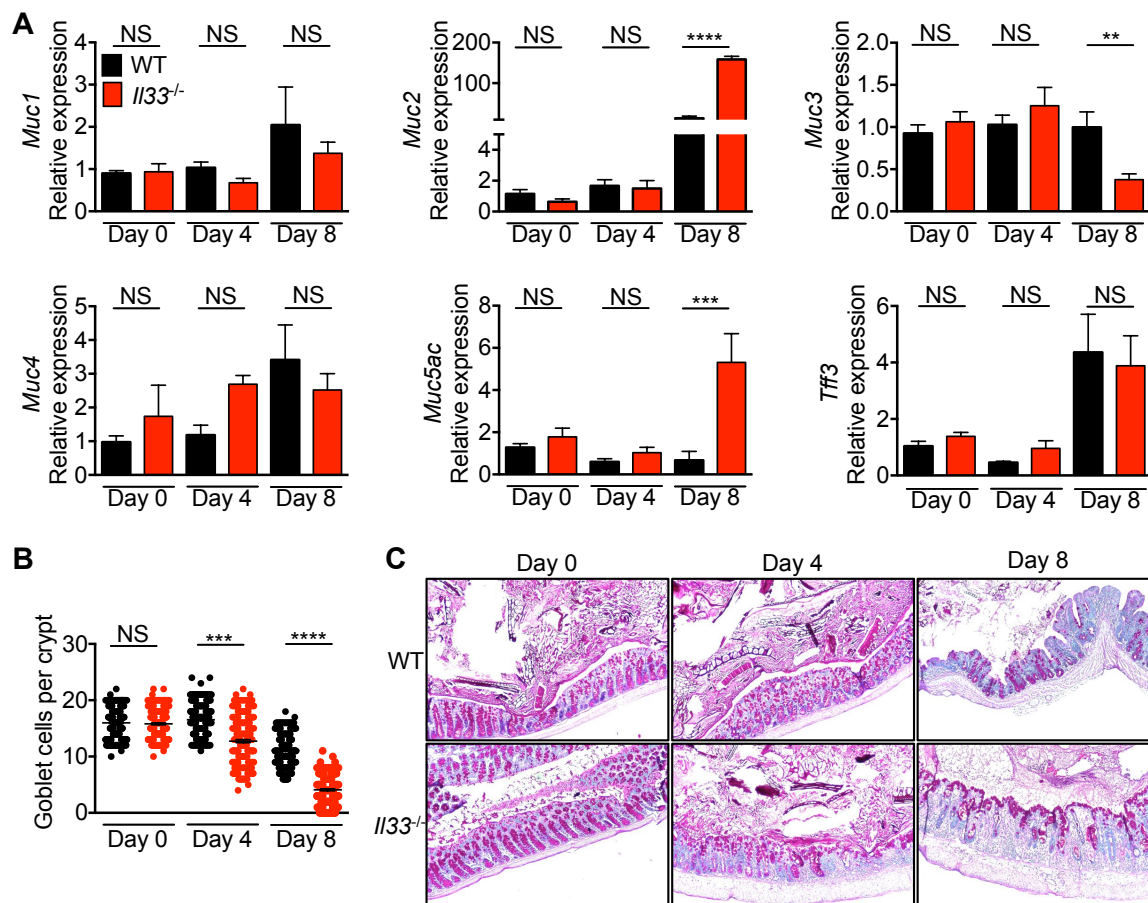

**Supplementary figure 4. Modulation of goblet cells during DSS administration in *Il33*<sup>-/-</sup> mice.** (A) Quantification of expression of mucins and goblet cell associated genes in the colons of WT and *Il33*<sup>-/-</sup> mice at indicated days post DSS administration by qRT-PCR. (B) Quantification of the number of goblet cells per crypt. (C) PAS staining at 10x original magnification of colon sections. Data was analyzed by Kruskal-Wallis test followed by Dunn's post test. Error bars represent mean±S.E.M. N= 8 each for (A), N=5 each for (B) and (C). Each dot represents an individual crypt.

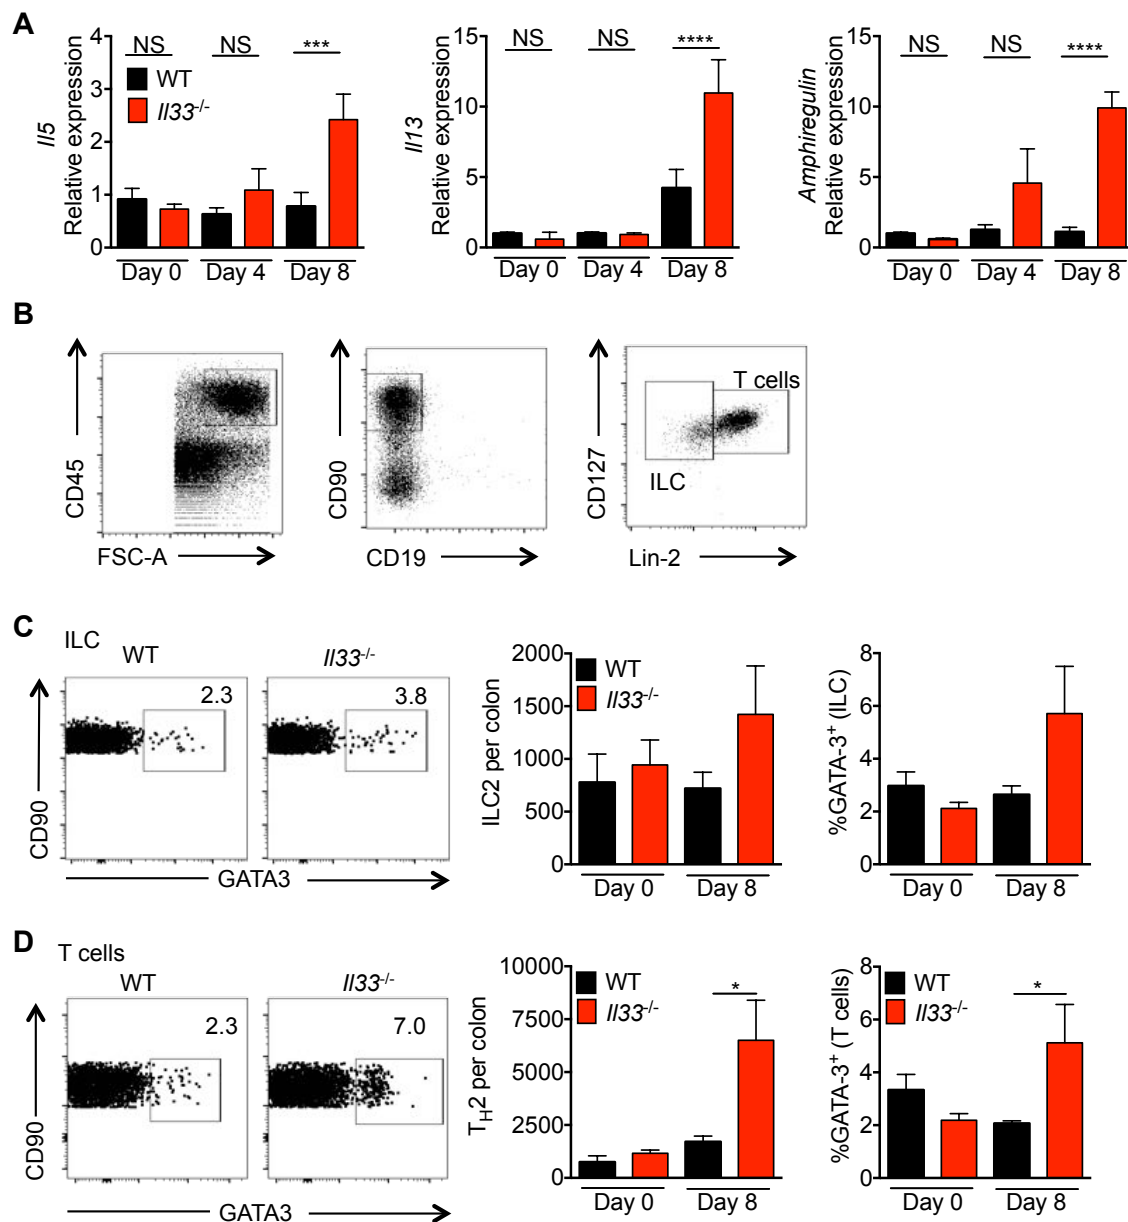

**Supplementary figure 5. ILC2 analysis in the colons of WT and I/33<sup>-/-</sup> mice. (A)** Quantification of expression of type 2 cytokines in the colons of WT and I/33<sup>-/-</sup> mice at indicated days post DSS administration by qRT-PCR. **(B)** Gating strategy for ILC2 cells, where Lin<sup>-</sup> represents CD3<sup>+</sup>B220<sup>-</sup>Ly-6C<sup>-</sup>Ly-6G<sup>-</sup>CD11b<sup>+</sup>Ter119<sup>-</sup>NKp46<sup>-</sup>. Proportion and total number of **(C)** ILC2s and **(D)** T<sub>H</sub>2 cells in the lamina propria. Data represent two independent experiments and analyzed by Kruskal-Wallis test followed by Dunn's post test. Error bars represent mean±S.E.M. with 10 mice per group per time point.

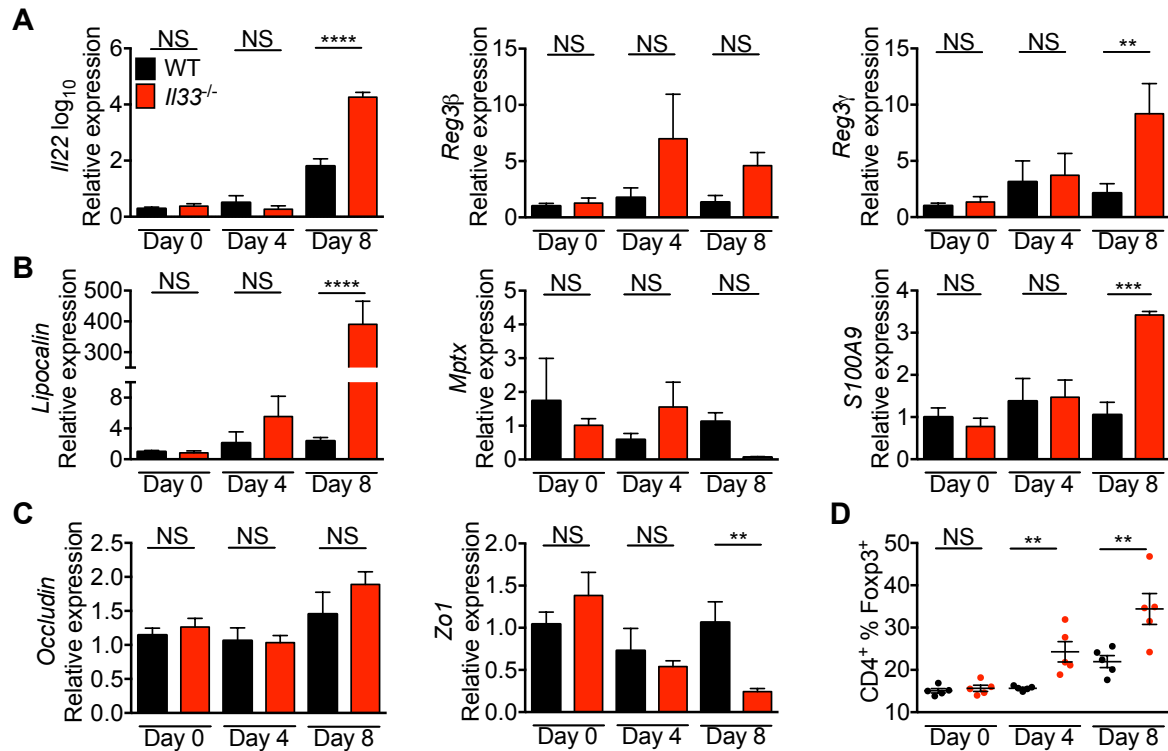

**Supplementary figure 6. There is no defect in induction of anti-inflammatory and epithelium healing genes or T regs in the colons of *I133*<sup>-/-</sup> mice. (A-C)** Quantification of expression of indicated genes in the colons of WT and *I133*<sup>-/-</sup> deficient mice at indicated days post DSS administration by qRT-PCR. **(D)** Quantification of T regulatory cells gated as CD19<sup>-</sup> CD3<sup>+</sup>CD4<sup>+</sup>Foxp3<sup>+</sup> cells in the lamina propria of the colon by flow cytometry. Data represent two independent experiments and analyzed by Kruskal-Wallis test followed by Dunn's post test. Error bars represent mean±S.E.M with 5 mice per group per time point.

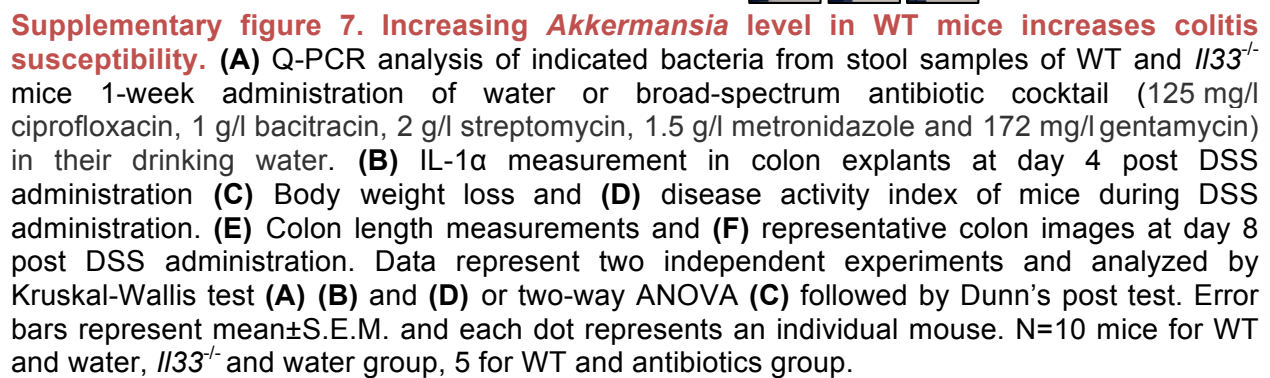

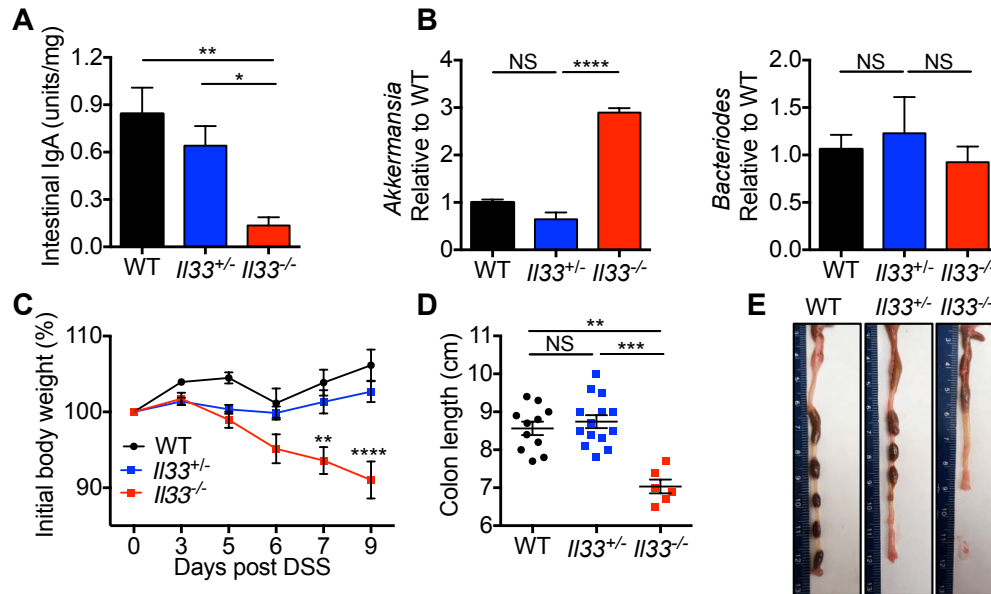

**Supplementary figure 8. *I33*<sup>-/-</sup> littermates have decreased intestinal IgA, increased level of *Akkermansia* and susceptibility to colitis.** (A) IgA measurement by ELISA and (B) qRT-PCR analysis of indicated bacteria from stool samples of WT, *I33*<sup>+/-</sup> and *I33*<sup>-/-</sup> mice 4 weeks after separation. (C) Body weight loss of mice during DSS administration. (D) Colon length measurements and (E) representative colon images at day 8 post DSS administration. Data is analyzed by Kruskal-Wallis test (A) (B) and (D) or two-way ANOVA (C) followed by Dunn's post test. Error bars represent mean±S.E.M. and each dot represents an individual mouse. N=11 mice for WT, 14 for *I33*<sup>+/-</sup> and 6 for *I33*<sup>-/-</sup> group.

## Supplementary Methods

### Preparation of single cell suspension from colon.

Single cell suspension was prepared from the colon as described previously (1). Briefly, for removal of epithelial cells, the colon was washed, cut into small pieces, and then the pieces were incubated with calcium- and magnesium-free HBSS supplemented with 5% FBS and 5 mM EDTA (Sigma-Aldrich) at 140 rpm at 25°C for 30 min. The tissues were then incubated with RPMI 1640 containing 10% FBS and 0.5 mg/ml collagenase type IV for 1 hour at 37°C with shaking at 150 rpm. The liberated cells were collected by passage through a 70 µm nylon mesh. The isolated cells from the EDTA (epithelial) and collagenase (lamina propria) treated fractions were separated on a 40/80% discontinuous Percoll gradient (GE Bioscience). The following monoclonal antibodies were used in appropriate combinations: anti-CD3 (clone 145 – 2C11), anti-CD4 (clone RM4-5), anti-CD19 (clone 1D3), anti-IgA (clone RMA-1), anti-Foxp3 (FJK-16s), anti-CD326 (clone G8.8), anti-CD16/CD32 (clone 93), anti-CD127 (clone A7R34), anti-GATA-3 (clone L50-823), anti-NKp46 (clone 29A1.4), anti-CD45.2 (clone 104), anti-CD90.2 (clone 30-H12), anti-MHCII (clone M5/114.152) and anti-mouse Lin cocktail (BioLegend, Catalog #133306). For intracellular cytokine staining, cells were fixed and permeabilized using fixation and permeabilization solution (eBioscience, Catalog # 00-5523). For intracellular cytokine staining, cells were fixed and permeabilized using fixation and permeabilization solution (eBioscience). Intracellular staining for the Foxp3 and GATA-3 transcription factors were performed using the eBioscience Foxp3 staining set according to the manufacturer's recommendations. Flow cytometry data were acquired on LSRII (BD) and were analyzed with FlowJo software (TreeStar).

## Western blotting

Proteins were extracted from colon tissues using RIPA lysis buffer supplemented proteinase and phosphatase inhibitors (Roche). Samples were resolved in 12-15% SDS-PAGE and transferred onto PVDF membranes. Blocking was performed in 5% milk for 1 hour and membranes were incubated in primary antibodies overnight at 4°C. Membranes were incubated with HRP-conjugated secondary antibody for 1 hour and proteins were visualized using ECL substrate (ThermoScientific). The primary antibodies were Caspase-1 p10 (1:500 dilution, sc-515, Santa Cruz biotechnology) GAPDH (1:10,00 dilution, clone D16H11, Cell Signaling) and IL-33 (1:1000 dilution, Catalog # AF3626 R&D systems).

**Supplementary Table 1.** Real time qPCR primer sequences

| Gene           | Primer Sequences                                                                    |
|----------------|-------------------------------------------------------------------------------------|
| <i>Gapdh</i>   | Forward: 5'-CGTCCCGTAGACAAAATGGT-3'<br>Reverse: 5'-TTGATGGCAACAATC TCC AC-3'        |
| <i>β-actin</i> | Forward: 5'-GGCTGTATTCCC CTCCATCG-3'<br>Reverse: 5'-CCAGTTGGTAACAATGCCATG T-3'      |
| <i>Il1α</i>    | Forward: 5'-AAAATCTCAGATTCACAACTGTTCGT-3'<br>Reverse: 5'-TGGCAACTCCTTCAGCAACAC-3'   |
| <i>Il5</i>     | Forward: 5'-GCAATGAGACGATGAGGCTT-3'<br>Reverse: 5'-CCCACGGACAGTTTGATTCT-3'          |
| <i>Il13</i>    | Forward: 5'-TGTGTCTCTCCCTCTGACCC-3'<br>Reverse: 5'-CACACTCCATACCATGCTGC-3'          |
| <i>Muc1</i>    | Forward: 5'-GCAGTCCTCAGTGGCACCTC-3'<br>Reverse: 5'-CACCGTGGGCTACTGGAGAG-3'          |
| <i>Muc2</i>    | Forward: 5'-GCTGACGAGTGGTTGGTGAATG-3'<br>Reverse: 5'-GATGAGGTGGCAGACAGGAGAC-3'      |
| <i>Muc3</i>    | Forward: 5'-CGTGGTCAACTGCGAGAATGG-3'<br>Reverse: 5'-CGGCTCTATCTCTACGCTCTCC-3'       |
| <i>Muc4</i>    | Forward: 5'-CAGCAGCCAGTGGGGACAG-3'<br>Reverse: 5'-CTCAGACACAGCCAGGGAAGTC-3'         |
| <i>Il22</i>    | Forward: 5'-AGAACGTCTTCCAGGGTGAA-3'<br>Reverse: 5'-CAT CGA CAT AAG TCA GCA CCA G-3' |
| <i>Reg3β</i>   | Forward: 5'-ATGGCTCCTACTGCTATGCC-3'<br>Reverse: 5'-GTGTCCTCCAGGCCTCTTT-3'           |
| <i>Reg3γ</i>   | Forward: 5'-ATGGCTCCTATTGCTATGC-3'<br>Reverse: 5'-GATGTCCTGAGGGCCTCTT-3'            |
| <i>Lcn2</i>    | Forward: 5'-ACATTTGTTCCAAGCTCCAGGGC-3'<br>Reverse: 5'-CATGGCGAACTGGTTGTAGTCCG-3'    |
| <i>Mptx</i>    | Forward: 5'-CCTGTTTCTCTCTGTTCTTTCAGG-3'<br>Reverse: 5'-GGCCTTCATACACAGAGTGAAG-3'    |

|                           |                                                                                      |
|---------------------------|--------------------------------------------------------------------------------------|
| <i>Areg</i>               | Forward: 5'-GCCATTATGCAGCTGCTTTGGAGC-3'<br>Reverse: 5'-TGTTTTTCTTGGGCTTAATCACCT-3'   |
| <i>S100A9</i>             | Forward: 5'-GGTGAAGCACAGTTGGCA-3'<br>Reverse: 5'-GTGTCCAGGTCCTCCATGATG-3'            |
| <i>Occludin</i>           | Forward: 5'-TTGAAAGTCCACCTCCTTACAGA -3'<br>Reverse: 5'-CCGGATAAAAAGAGTACGCTGG-3'     |
| <i>Zo1</i>                | Forward: 5'-GCCGCTAAGAGCACAGCAA-3'<br>Reverse: 5'-GCCCTCCTTTTAACACATCAGA -3'         |
| <i>Tff3</i>               | Forward: 5'-CCTGGTTGCTGGGTCTCTG-3'<br>Reverse: 5'-GCCACGGTTGTTACACTGCTC-3'           |
| <i>plgR</i>               | Forward: 5'-AAGAAGTACCAAAGGGAGGA-3'<br>Reverse: 5'-AGAGTAACTTCAATTCTGCACCC-3'        |
| <i>Muc5ac</i>             | Forward: 5'-CTGTGACATTATCCCATAAGCCC-3'<br>Reverse: 5'-AAGGGGTATAGCTGGCCTGA-3'        |
| <i>Eubacteria</i>         | Forward: 5'-ACTCCTACGGGAGGCAGCAGT-3'<br>Reverse: 5'-ATTACCGCGGCTGCTGGC-3'            |
| <i>Bacteroides</i>        | Forward: 5'-GGTTCTGAGAGGAGGTCCC-3'<br>Reverse: 5'-CTGCCTCCCGTAGGAGT-3'               |
| <i>Enterobacteriaceae</i> | Forward: 5'-GTGCCAGCMG CCGCGGTAA-3'<br>Reverse: 5'-GCCTCAAGGG CACAACCTCC AAG-3'      |
| <i>γ-Proteobacteria</i>   | Forward: 5'-TAACGCTTGG GAATCTGCCT RTT-3'<br>Reverse: 5'-CATCTRTTAG CGCCAGGCCT TGC-3' |
| <i>Fungal 18s</i>         | Forward: 5'- ATTGGAGGGCAAGTCTGGTG-3'<br>Reverse: 5'-CCGATCCCTAGTCGGCATAG-3'          |
| <i>Prevotellaceae</i>     | Forward: 5'- ATTGGAGGGCAAGTCTGGTG-3'<br>Reverse: 5'-CCGATCCCTAGTCGGCATAG-3'          |
| <i>Akkermansia</i>        | Forward: 5'-CAGCACGTGAAGGTGGGGAC-3'<br>Reverse: 5'-CCTTGCGGTTGGCTTCAGAT-3'           |
| <i>Anaerostipes</i>       | Forward: 5'-AAGTCGAACGAAGCACCTTG-3'<br>Reverse: 5'-TCCGCCACTCAGTCACAATG-3'           |
| <i>Dorea</i>              | Forward: 5'-ACGGTACCTGACTAAGAAGCCC-3'<br>Reverse: 5'-CCTCAACGTCAGTCATCGTCC-3'        |
| <i>E. rectale</i>         | Forward: 5'-ACTCCTACGGGAGGCAGC-3'<br>Reverse: 5'-GCTTCTTAGTCAGGTACCGTCA-3'           |
| <i>Flexispira</i>         | Forward: 5'-AATACATGCAAGTCGAACGATGA-3'<br>Reverse: 5'-AATCACCGTTTCCAGTGGCT-3'        |
| <i>Clostridia</i>         | Forward: 5'-CTCAACTTGGGTGCTGCATTT-3'<br>Reverse: 5'-ATTGTAGTACGTGTGTAGCCC-3'         |
| <i>E. coli</i>            | Forward: 5'-CATGCCGCGTGTATGAAGAA-3'<br>Reverse: 5'-CGGGTAACGTCAATGAGCAAA-3'          |
| <i>Prevotella</i>         | Forward: 5'-CACGGTAAACGATGGATGCC-3'<br>Reverse: 5'-GGTCGGGTTGCAGACC-3'               |
| <i>Lactobacillus</i>      | Forward: 5'-GGAAACAGATGCTAATACCG-3'<br>Reverse: 5'-CACCGCTACACATGGAG-3'              |
| <i>MIB</i>                | Forward: 5'-CCAGCAGCCGCGGTAATA-3'<br>Reverse: 5'-CGCATTCCGCATACTTCTC-3'              |
| <i>SFB</i>                | Forward: 5'-GACGCTGAGGCATGAGAGCA-3'<br>Reverse: 5'-GACGGCACGGATTGTTATTC-3'           |
| <i>Tm7</i>                | Forward: 5'- GCAACTCTTTACGCCAGT-3'<br>Reverse: 5'- GAGAGGATGATCAGCCAG-3'             |

217  
218  
219  
220  
221  
222

1. Malik A, Sharma D, St Charles J, Dybas L, and Mansfield L. Contrasting immune responses mediate *Campylobacter jejuni*-induced colitis and autoimmunity. *Mucosal immunology*. 2013.
